## ***Drosophila* embryogenesis scales uniformly across temperature and developmentally diverse species**

Steven G. Kuntz<sup>1,2\*</sup>, Michael B. Eisen<sup>1,2,3,4</sup>

**1 QB3 Institute for Quantitative Biosciences, University of California, Berkeley, California, United States of America**

**2 Department of Molecular and Cell Biology, University of California, Berkeley, California, United States of America**

**3 Howard Hughes Medical Institute, University of California, Berkeley, California, United States of America**

**4 Department of Integrative Biology, University of California, Berkeley, California, United States of America**

**\* E-mail: [sgkuntz@berkeley.edu](mailto:sgkuntz@berkeley.edu)**

### **Abstract**

Temperature affects both the timing and outcome of animal development, but the detailed effects of temperature on the progress of early development have been poorly characterized. To determine the impact of temperature on the order and timing of events during *Drosophila melanogaster* embryogenesis, we used time-lapse imaging to track the progress of embryos from shortly after egg laying through hatching at seven precisely maintained temperatures between 17.5°C and 32.5°C. We employed a combination of automated and manual annotation to determine when 36 milestones occurred in each embryo. *D. melanogaster* embryogenesis takes 33 hours at 17.5°C, and accelerates with increasing temperature to a low of 16 hours at 27.5°C, above which embryogenesis slows slightly. Remarkably, while the total time of embryogenesis varies over two fold, the relative timing of events from cellularization through hatching is constant across temperatures. To further explore the relationship between temperature and embryogenesis, we expanded our analysis to cover ten additional *Drosophila* species of varying climatic origins. Six of these species, like *D. melanogaster*, are of tropical origin, and embryogenesis time at different temperatures was similar for them all. *D. mojavensis*, a sub-tropical fly, develops slower than the tropical species at lower temperatures, while *D. virilis*, a temperate fly, exhibits slower development at all temperatures. The alpine sister species *D. persimilis* and *D. pseudoobscura* develop as rapidly as tropical flies at cooler temperatures, but exhibit diminished acceleration above 22.5°C and have drastically slowed development by 30°C. Despite ranging from 13 hours for *D. erecta* at 30°C to 46 hours for *D. virilis* at 17.5°C, the relative timing of events from cellularization through hatching is constant across all of the species and temperatures examined here, suggesting the existence of a previously unrecognized timer controlling the progress of embryogenesis that has been tuned by natural selection in response to the thermal environment in which each species lives.

### **Author Summary**

Temperature profoundly impacts the rate of development of “cold-blooded” animals, which proceeds far faster when it is warm. There is, however, no universal relationship. Closely related species can develop at markedly different speeds at the same temperature, likely resulting from environmental adaptation. This creates a major challenge when comparing development among species, as it is unclear whether they should be compared at the same temperature or under different conditions to maintain the same developmental rate. Facing this challenge while working with flies (*Drosophila* species), we found there was little data to inform this decision. So, using time-lapse imaging, precise temperature-control, and computational and manual video-analysis, we tracked the complex process of embryogenesis in 11 species at seven different temperatures. There was over a three-fold difference in developmental rate between the

fastest species at its fastest temperature and the slowest species at its slowest temperature. However, our finding that the timing of events within development all scaled uniformly across species and temperatures astonished us. This is good news for developmental biologists, since we can induce species to develop nearly identically by growing them at different temperatures. But it also means flies must possess some unknown clock-like molecular mechanism driving embryogenesis forward.

## Introduction

It has long been known that *Drosophila*, like most poikilotherms, develops faster at higher temperatures, with embryonic [1], larval [1, 2], and pupal stages [3, 4], as well as total lifespan [5, 6] showing similar logarithmic trends. While genetics, ecology, and evolution of this trait have been investigated for over a century [2, 7–17], the effects of temperature on the order and relative timing of developmental events, especially within embryogenesis, are poorly understood.

We became interested in the relationship between species, temperature, and the cadence of embryogenesis for practical reasons. Several years ago, we initiated experiments looking at the genome-wide binding of transcription factors in the embryos of divergent *Drosophila* species: *D. melanogaster*, *D. pseudoobscura*, and *D. virilis*. With transcription factor binding a highly dynamic process, we tried to match both the conditions (especially temperature, which we believed would affect transcription factor binding) in which embryos were collected and the developmental stages we analyzed. However, our initial attempts to collect *D. pseudoobscura* embryos at 25°C —the temperature at which we collect *D. melanogaster* —were unsuccessful, with large numbers of embryos failing to develop, likely a consequence of *D. pseudoobscura*'s alpine origin. While *D. virilis* lays readily at 25°C, we found that their embryos develop more slowly than *D. melanogaster*, complicating the collection of developmental stage-matched samples.

Having encountered such challenges with just three species, and planning to expand to many more, we were faced with several important questions. Given that embryogenesis occurs at different rates in different species [18], how should we time collections to get the same mix of stages we get from our standard 2.5–3.5 hour collections in *D. melanogaster*, or any other stage we study in the future? Is it better to compare embryos collected at the same temperature even if it is not optimal for, or even excludes, some species; or, should we collect embryos from each species at their optimal temperature, if such a thing exists? Should we select a temperature for each species so that they all develop with a similar velocity? Or should we find a set of species that develop at the same speed at a common temperature? And even if we could match the overall rate of development, would heterochronic effects mean that we could not get an identical mix of stages?

We found a woeful lack in the kind of data needed to answer these questions. Powsner precisely measured the effect of temperature on the total duration of embryogenesis in *D. melanogaster* [1], and Markow made similar measurements for other *Drosophila* species at a fixed temperature (24°C) [18], but the precise timing of events within embryogenesis had been described only for *D. melanogaster* at 25°C [19, 20].

The work described here was born to address this deficiency. We used a combination of precise temperature control, time-lapse imaging, and careful annotation to catalog the effects of a wide range of temperatures on embryonic development in 11 *Drosophila* species from diverse climates. We focused on species with published genome sequences [21] (Table 1), as these are now preferentially used for comparative and evolutionary studies. Of the species we studied *D. melanogaster*, *D. ananassae*, *D. erecta*, *D. sechellia*, *D. simulans*, *D. willistoni*, and *D. yakuba* are all native to the tropics, though *D. melanogaster*, *D. ananassae*, and *D. simulans* have spread recently to become increasingly cosmopolitan [17]. *D. mojavensis* is a sub-tropical species, while *D. virilis* is a temperate species that has become holarctic and *D. persimilis* and *D. pseudoobscura* are alpine species (Figure 1A).

## Results

### Time-lapse imaging tracks major morphological events

We used automated, time-lapse imaging to track the development of embryos held at a constant and precise temperature from early embryogenesis (pre-cellularization) to hatching. We maintained the temperature at  $\pm 0.1^\circ\text{C}$  using thermoelectric Peltier heat pumps. Different sets of embryos were analyzed at temperatures ranging from  $17.5^\circ\text{C}$  to  $32.5^\circ\text{C}$ , in  $2.5^\circ\text{C}$  increments. Images were taken every one to five minutes, depending on the total time of development. A minimum of four embryos from each species were imaged for each temperature, for a total of 77 conditions. In total, time-lapse image series were collected and analyzed from over 1000 individual embryos.

We encountered, and solved, several challenges in designing the experimental setup, including providing the embryos with sufficient oxygen [22,23] and humidity. We found that glass slides were problematic due to a lack of oxygenation and led to a 28% increase in developmental time, so we instead employed an oxygen-permeable tissue culture membrane, mounted on a copper plate to maintain thermal conduction. At higher temperatures, we found that the embryos dehydrated, so humidifiers were used to increase ambient humidity. Detailed photos of the apparatus and descriptions can be found in Figure S1.

We used a series of simple computational transformations (implemented in Matlab) to orient each embryo, correct for shifting focus, and adjust the brightness and contrast of the images, creating a time-lapse movie for each embryo. We manually examined images from 60 time-lapse series in *D. melanogaster* and identified 36 distinct developmental stages [19,20] that could be recognized in our movies (Table 2, <http://www.youtube.com/watch?v=dYSrXK3o86>). Due to the volume of images collected, we implemented a semi-automated system to annotate our entire movie collection. Briefly, images from matching stages in manually annotated *D. melanogaster* movies were averaged to generate composite reference images for each stage (Figure 2A). We then correlated each of these composite reference images to the images in each time-lapse to estimate the timing of each morphological stage (Figure 2B).

Of the 36 events, the nine most unambiguous events were selected for refinement and further analysis (pole bud appears, membrane reaches yolk, pole cell invagination, amnioproctodeal invagination, amnioserosa exposed, clypeolabrum retracts, heart-shaped midgut, and trachea fill) (Figure 2C,D). Using a Python-scripted graphical user interface, each of the nine events in every movie was manually examined and the algorithm prediction adjusted when necessary. Timing of hatching was excluded from these nine primary events because it was highly variable, likely due to the assay conditions following dechoriation, and suitable only as an indication of successful development, not as a reliable and reproducible time point. The “membrane reaches yolk stage” was used throughout as a zero point due to the precision with which the stage could be identified in all species and from all orientations.

Links to representative time-lapse videos are provided in Table 3.

### *D. melanogaster* embryogenesis scales uniformly with temperature

As expected, the total time of embryogenesis of *D. melanogaster* had a very strong dependence on temperature (Figure 3, <http://www.youtube.com/watch?v=-yrs4DcFFF0>). From  $17.5^\circ\text{C}$  to  $27.5^\circ\text{C}$ , there was a two-fold acceleration in developmental rate, matching the previously observed doubling of total lifespan with a  $10^\circ\text{C}$  change in temperature [6]. The velocity of embryogenesis at  $30^\circ\text{C}$  is roughly the same as at  $27.5^\circ\text{C}$ , and is appreciably slower at  $32.5^\circ\text{C}$ , likely due to heat stress. At  $35^\circ\text{C}$ , successful development becomes extremely rare.

To examine how these temperature-induced shifts in the total time of embryogenesis were reflected in the relative timing of individual events, we rescaled the time series data for each embryo so that the time from our most reliable early landmark (the end of cellularization) to our most reliable late landmark (trachea filling) was identical, and examined where each of the remaining landmarks fell (Figure 3C). We were surprised to find that *D. melanogaster* exhibited no major changes in its proportional developmental

time under any of the non-stressful temperature conditions tested. Therefore, at least as far as most visually evident morphological features go, embryogenesis scales uniformly across a two-fold range of total time.

When the embryos were under heat stress ( $>30^{\circ}\text{C}$ ), we observed a very slight contraction in the proportion of time between early development (pole bud appears) to the end of cellularization (membrane reaches yolk), and a slight contraction between the end of cellularization and mid-germ band retraction (amnioserosa exposure).

## Embryogenesis scales uniformly across species despite significant differences in temperature dependent developmental rate

In each of the ten additional *Drosophila* species we examined we observed all of the 36 developmental landmarks we identified in *D. melanogaster* in the same temporal order (Figure 4A). However, there was marked interspecies variation in both the total time of embryogenesis at a given temperature (Figure 4B-E, Table 3) and the way embryogenesis time varied with temperature (Figure 5).

When we examined the 10 remaining species, we found not only that the relative timing of events was constant across temperature within a species, as observed in *D. melanogaster*, but that landmarks occurred at the same relative time between species at all non-stressful temperatures (Figures 6, Table 4).

## Developmental time is exponentially related to $1/T$

Between  $17.5^{\circ}\text{C}$  and  $27.5^{\circ}\text{C}$  the total developmental time for all species can be approximated relatively accurately by an exponential regression ( $R^2 > 0.9$ ). For all species we find that temperature  $T$  can be related to developmental time  $t_{dev}$ , agreeing with a long history of temperature-dependent rate modeling [24]:

$$t_{dev} \approx e^{\frac{1}{T}}$$

and developmental rate  $v$ :

$$\ln(v) \approx -\frac{1}{T}$$

The parameters of these relations for each species, which includes two independent coefficients, are included in Table 5. Also included in Table 5 is the  $Q_{10}$ , an empirical description of biological rate change from a  $10^{\circ}\text{C}$  temperature change, for the  $17.5^{\circ}\text{C}$  to  $27.5^{\circ}\text{C}$  interval. At higher temperatures, heat stress appears to counter the logarithmic trend and lengthens developmental time. Since the temperature responses are highly reproducible, the developmental time for each species can be modeled and predictions made for future experiments (Figure S4).

## Effect of temperature on developmental rate is coupled to climatic origin

Seven of the eleven species we examined were of tropical origin, with only two alpine, one subtropical and one temperate species. At mid-range temperatures ( $22.5^{\circ}\text{C}$  -  $27.5^{\circ}\text{C}$ ), the tropical species developed the fastest, followed by the subtropical *D. mojavensis*, the alpine *D. pseudoobscura* and *D. persimilis*, and the temperate *D. virilis* (Figure 5), in accord with [18].

The tropical species all showed highly similar responses to temperature, even though they originate from different continents (Africa, Asia and South America) and are not closely related (five of the species are in the melanogaster subgroup, but *D. ananassae* and *D. willistoni* are highly diverged from both *D. melanogaster* and each other). The embryogenesis rate for these species increases rapidly with temperature ( $Q_{10} \sim 2.2$ ) before slowing down at and above  $30^{\circ}\text{C}$  (Figure S3A-F, <http://www.youtube.com/watch?v=vy6L4fmWkso>). The two closely related alpine species (*D. pseudoobscura* and *D. persimilis*) match the embryogenesis rate of the tropical species at  $17.5^{\circ}\text{C}$ , but accelerate

far less rapidly with increasing temperature ( $Q_{10} \sim 1.6$ ), especially at 25°C and above (Figure S3I,J, <http://www.youtube.com/watch?v=sYi-FUXpv4Q>). These species also show a sharp increase in embryogenesis rate and low viability above 27.5°C, consistent with their cooler habitat. The subtropical *D. mojavensis* (Figure S3H, [http://www.youtube.com/watch?v=XWms4oUx\\_mU](http://www.youtube.com/watch?v=XWms4oUx_mU)) and temperate *D. virilis* (Figure S3G, <http://www.youtube.com/watch?v=eyr4ckDb0kM>) both develop very slowly at low temperature, but accelerate rapidly as temperature increases ( $Q_{10}$  of  $\sim 2.5$  and  $\sim 2.2$  respectively). *D. virilis* remains the slowest species up to 30°C, while *D. mojavensis* is as fast as the tropical species at high temperatures.

## Effects of heat stress

Under heat-stress, the proportionality of development is disrupted in some embryos (Figure S5A). The effect is not uniform, as some embryos developed proportionally under heat-stress and others exhibited significant aberrations, largely focused in post-germband shortening stages. This can be most clearly seen in individuals of *D. ananassae*, *D. mojavensis*, *D. persimilis*, and *D. pseudoobscura*. We did not identify any particular stage as causing this delay, but rather it appears to reflect a uniform slowing of development.

Early heat shock significantly disrupts development enough to noticeably affect morphology in yolk contraction, cellularization, and gastrulation (Figure S5B). Syncytial animals are the most sensitive to heat-shock (Figure S5C). In *D. melanogaster* and several other species we observed a slight contraction of proportional developmental time between early development (pole bud appears) and the end of cellularization (membrane reaches yolk) under heat-stress ( $> 30^\circ\text{C}$ , Figure S5D). While all later stages following cellularization maintain their proportionality even at very high temperatures, the pre-cellularization stages take proportionally less and less time. This indicates that at higher temperatures, some pre-cellularization kinetics scale independently of later stages, possibly leading to mortality as the temperature becomes more extreme.

## Discussion

We have addressed the lack of good data on the progress of embryogenesis in different species and at different temperatures with a carefully collected and annotated series of time-lapse movies in 11 species at seven temperatures that span most of the viable range for *Drosophila* species. From a practical standpoint, the predictable response of each species to temperature, and the uniform scaling of events between species and temperature, provides a relatively simple answer to the question that motivated this study - to determine how to obtain matched samples for genomic studies: simply choose the range of stages to collect in one species, and scale the collection and aging times appropriately. The fact that development scales uniformly over non-extreme temperatures would seem to give some leeway in the choice of temperature, so long as heat-stress is avoided, though it remains unclear how molecular processes are affected by temperature.

## Uniform scaling and the timing of embryogenesis

In carrying out this survey, we were surprised to find that the relative timing of landmark events in *Drosophila* embryogenesis is constant across greater than three-fold changes in total time, spanning 15°C and over 100 million years of independent evolution. And the fact that the same holds true for 34 developmental landmarks at two temperatures in the zebrafish *Danio rerio* [25], (the only other species for which we were able to locate similar data), suggests that this phenomenon may have some generality. But why is this so?

*Drosophila* development involves a diverse set of cellular processes including proliferation, growth, migration, polarization, differentiation, and tissue formation. One might expect (we certainly did) these different processes to scale independently with temperature, much as different chemical reactions do, and as a result, different stages of embryogenesis or parts of the developing embryo would scale differentially with temperature. But this is not the case. The simplest explanation for this observation is that a single shared mechanism controls timing across embryogenesis throughout the genus *Drosophila*. But what could such a mechanism be? One possibility is that there is an actual clock —some molecule or set of molecules whose abundance or activity progresses in a clocklike manner across embryogenesis and is read out to trigger the myriad different processes that occur in the transition from a fertilized egg to a larvae. However there is no direct evidence that such a clock exists (although we note that there is a pulse of ecdysone during embryogenesis with possible morphological functions [26,27]). A more likely explanation is that there is a common rate limiting process throughout embryogenesis. Our data are largely silent on what this could be, but we know from other experiments that it is cell, or at least locally, autonomous [28–30] and would have to limit processes like migration that do not require cell division (we also note that cell division has been excluded as a possibility in zebrafish [30]). However, energy production, yolk utilization, transcription or protein synthesis are reasonable possibilities.

Although there are very few comparisons of the relative timing of events during development, it has long been noted that various measurements of developmental timing scale exponentially with  $1/T$  [1, 5, 6, 24, 31], but no good explanation for this phenomenon has been uncovered. Perhaps development is more generally limited by something that scales exponentially with  $1/T$ , like metabolic rate, which, we note, has been implicated numerous times in lifespan, which is, in some ways, a measure of developmental timing.

Gillooly and co-workers, noting there was a relationship between metabolic rate, temperature and animal size, have proposed a model that incorporates mass into the Arrhenius equation to explain the relationship between these factors in species from across the tree of life [32,33]. We, however, do not find that mass can explain the differences in temperature-dependence between species. Even closely-related species, with nearly 2-fold differences in their mass (e.g. *D. melanogaster*, *D. simulans*, *D. sechellia*, *D. yakuba*, and *D. erecta*), have significant divergence in their proportionality coefficients that do not converge at all when correcting for differences in mass through the one quarter power scaling proposed by Gillooly, et al. This suggests that some other factor is responsible for the differences, as has been argued by other groups [18,34,35]. The relationship between climate and temperature response raises the possibility that whatever this factor is has been subject to selection to tune the temperature response to each species' climate. However, without additional data this is purely a hypothesis.

Although a common rate-limiting step is simplest explanation for uniform scaling, it is certainly not the only one. It is possible that different rate limiting steps or other processes control developmental velocity at different times or in different parts of the embryo, and that they scale identically with temperature either coincidentally, or as the result of selection (it is important to remember that, as per Arrhenius, one does not expect different reactions to scale identically with temperature). If this is the result of selection, what is the selection pressure? Evolutionary developmental biologists, perhaps most notably Stephen J. Gould, have long written about how changes in either the absolute or relative timing of different events during development have had significant effects on morphology throughout animal evolution [36–39]. Perhaps this is also true for fly embryogenesis, but that any such changes in morphology are selectively disadvantageous and have been strongly selected against. It is also likely that many developing fly embryos experience significant changes in temperature while developing, so there may be strong selection to maintain uniform development across temperature to ensure normal progression while the temperature is changing.

Finally, we note that there are limits to this uniformity. At extreme temperatures, especially high ones, things no longer scale uniformly, likely reflecting the differential negative effects of high temperature at different stages of embryogenesis as well as the differential ability of the embryo to compensate for



them. There are also clearly checkpoints in place that, while not triggered during normal embryogenesis, are important in extreme or unusual circumstances. Most strikingly, when Lucchetta et al. and Niemuth et al. examined embryos developing in chambers that allowed for independent temperature control of the anterior and posterior portions of the embryo, the two parts of the embryo developed at different velocities for much of embryogenesis [28,29]. They found that embryos are robust to asynchrony in timing across the embryo, though there are critical periods that, once passed, do not permit re-synchronization of development [28], hinting at some specific checkpoints or feedback.

## Climate and the rate of embryogenesis

The clustering of developmental timing and its temperature response with climate —especially amongst tropical species from different continents and parts of the *Drosophila* tree —suggests that this is an adaptive phenotype, although with only 11 species and poor coverage of non-tropical species this has to remain highly speculative. The poor response of the alpine *D. pseudoobscura* and *D. persimilis* to high temperature is consistent with their cool climate, but the other features are more difficult to rationalize, especially given how little is known about when and where most of these species lay their eggs.

The clustering of developmental responses in species by their native climates rather than their climates of collection suggests that climate adaptation arises slowly or can be lost. The tested strain of *D. melanogaster* was collected in a temperate climate and the *D. simulans* strain was collected in a subtropical climate. Nevertheless, both performed nearly identically to other tropical species and unlike native species collected nearby. This suggests that temperature responses are neither rapidly evolving (with *D. melanogaster* being present in the temperate United States for over 130 years [40]) nor already present but unactivated in tropical species.

## Materials and Methods

### Rearing of *Drosophila*

*Drosophila* strains were reared and maintained on standard fly media at 25°C, except for *D. persimilis* and *D. pseudoobscura* which were reared and maintained at 22°C. A *D. melanogaster* line was raised at 18°C for several years and its temperature response profile was observed, verifying that growth at lower temperatures does not account for all of the differences between the tropical and alpine species (data not shown). Egg-lays were performed in medium cages on 10 cm molasses plates for 1 hour at 25°C after pre-clearing for all species except *D. persimilis*, which layed at 22°C. To encourage egg-lay, cornmeal food media was added to plates for *D. sechellia* and pickled cactus was added to plates for *D. mojavensis*. Embryos were collected and dechorionated with fresh 50% bleach solution (3% hypochlorite final) for 45 to 90 seconds (based on the species) in preparation for imaging. Dechoronation timing was selected as the time it took for 90% of the eggs to be successfully dechorionated. This prevented excess bleaching, as many species, such as *D. mojavensis*, are more sensitive than *D. melanogaster*. Strains used were *D. melanogaster*, OreR; *D. pseudoobscura*, 14011-0121.94, MV2-25; *D. virilis*, 15010-1051.87, McAllister V46; *D. yakuba*, 14021-0261.01, Begun Tai18E2; *D. persimilis*, 14011-0111.49, (Machado) MSH3; *D. simulans*, 14021-0251.195, (Begun) simw501; *D. erecta*, 14021-0224.01, (TSC); *D. mojavensis wrightleyi*, 15081-1352.22, (Reed) CI 12 IB-4 g8; *D. sechellia*, 14021-0248.25, (Jones) Robertson 3C; *D. willistoni*, 14030-0811.24, Powell Gd-H4-1; *D. ananassae*, 14024-0371.13, Matsuda (AABBg1).

### Time-lapse Imaging

Embryos were placed on oxygen-permeable film (lumox™, Greiner Bio-one), affixed with dried heptane glue and then covered with Halocarbon 700 oil (Sigma) [41]. The lumox film was suspended on a copper plate that was temperature-regulated with two peltier plates controlled by an H-bridge temperature

controller (McShane Inc., 5R7-570) with a thermistor feedback, accurate to  $\pm 0.1^\circ\text{C}$ . Time-lapse imaging with bright field transmitted light was performed on a Leica M205 FA dissecting microscope with a Leica DFC310 FX camera using the Leica Advanced Imaging Software (LAS AF) platform. Greyscale images were saved from pre-cellularization to hatch. Images were saved every one to five minutes, depending on the temperature. Due to fluctuations in ambient temperature and humidity, the focal plane through the halocarbon oil varied significantly. Therefore, z-stacks were generated for each time-lapse and the most in-focus plane at each time was computationally determined for each image using an algorithm (implemented in Matlab) through image autocorrelation [42, 43].

## Event estimation

A subset of time-lapses in *D. melanogaster* were analyzed to obtain a series of representative images for each of the 36 morphological events, selected as all events defined by [19, 44] that were reproducibly identifiable under our conditions, described. These images were sorted based on embryo orientation and superimposed to generate composite reference images. Images from each time-lapse to be analyzed were manually screened to determine the time when the membrane reaches the yolk, the time of trachea filling, and the orientation of the embryo. This information was fed into a Matlab script, along with the time-lapse images and the set of 34 composite reference images, to estimate the time of 34 morphological events during embryogenesis via image correlation. The same *D. melanogaster* reference images were used for all species for consistency. A correlation score was generated for each frame of the time-lapse. The running score was then smoothed (Savitzky-Golay smoothing filter) and the expected time window was analyzed for local maxima. Computer-aided estimates were individually verified or corrected using a python GUI for all included data.

## Statistical analysis

Statistical significance of event timing was determined by t-test with Bonferonni multiple testing corrections. Median correction to remove outliers was used in determining the mean and standard deviation of each developmental event. Least-squares fitting was used to determine the linear approximation of log-corrected developmental time for each species. Python and Matlab scripts used in the data analysis are available at [github.com/sgkuntz/TimeLapseCode.git](https://github.com/sgkuntz/TimeLapseCode.git).

## Acknowledgments

This work was supported by a Howard Hughes Medical Institute investigator award to MBE and by NIH grant HG002779 to MBE. SGK was supported by the National Institutes of Health under Ruth L. Kirschstein National Research Service Award (F32-FGM101960A) from the National Institute of General Medical Sciences. We obtained flies from the Bloomington and UCSD stock centers. We would also like to thank T. Kaplan and P. Combs for their advice and assistance on data analysis and programming, C. Bergman for comments, Ng Wei Tian for his work on event verification, and BCK and EDKK for their support.

## References

1. Powsner L (1935) The effects of temperature on the durations of the developmental stages of *Drosophila melanogaster*. *Physiological Zoology* 8: 474-520.
2. James AC, Azevedo RB, Partridge L (1995) Cellular basis and developmental timing in a size cline of *Drosophila melanogaster*. *Genetics* 140: 659-666.



3. James AC, Azevedo RB, Partridge L (1997) Genetic and environmental responses to temperature of *Drosophila melanogaster* from a latitudinal cline. *Genetics* 146: 881–890.
4. Yamamoto A, Ohba S (1982) Strategic differences in thermal adaptation between two *Drosophila* species, *D. virilis* and *D. immigrans*. *Oecologia* 52: 333–339.
5. Lillie FR, Knowlton FP (1897) On the effect of temperature on the development of animals. *Zoological Bulletin* 1: 179–193.
6. Loeb J, Northrop JH (1916) Is there a temperature coefficient for the duration of life? *PNAS* 2: 456–7.
7. Partridge L, Barrie B, Fowler K, French V (1994) Evolution and development of body and cell size in *Drosophila melanogaster* in response to temperature. *Evolution* 48: 1269–1276.
8. Kim J, Kerr JQ, Min GS (2000) Molecular heterochrony in the early development of *Drosophila*. *Proceedings of the National Academy of Sciences of the United States of America* 97: 212–216.
9. Tantawy AO (1963) Effects of temperature and x-ray irradiation on intrinsic growth rate in populations of *Drosophila pseudoobscura*. *Genetica* 34: 34–45.
10. Strataman R, Markow TA (1998) Resistance to thermal stress in desert *Drosophila*. *Functional Ecology* 12: 965–970.
11. Morin J, Moreteau B, Pétavy G, Parkash R, David J (1997) Reaction norms of morphometrical traits in *Drosophila*: adaptive shape changes in a stenotherm circumtropical species. *Evolution* 51: 1140–1148.
12. Montchamp-Moreau C (1983) Interspecific competition between *Drosophila melanogaster* and *Drosophila simulans*: temperature effect on competitive ability and fitness components. *Genet Sel Evol* 15: 367–78.
13. Hoffmann AA, Hallas R, Sinclair C, Mitrovski P (2001) Levels of variation in stress resistance in *Drosophila* among strains, local populations, and geographic regions: patterns for desiccation, starvation, cold resistance, and associated traits. *Evolution; international journal of organic evolution* 55: 1621–1630.
14. Hoffmann AA, Weeks AR (2007) Climatic selection on genes and traits after a 100 year-old invasion: a critical look at the temperate-tropical clines in *Drosophila melanogaster* from eastern Australia. *Genetica* 129: 133–147.
15. Rako L, Blacket MJ, McKechnie SW, Hoffmann AA (2007) Candidate genes and thermal phenotypes: identifying ecologically important genetic variation for thermotolerance in the Australian *Drosophila melanogaster* cline. *Molecular Ecology* 16: 2948–2957.
16. Gibert P, De Jong G (2001) Temperature dependence of development rate and adult size in *Drosophila* species: biophysical parameters. *Journal of Evolutionary Biology* 14: 267–276.
17. Markow TA, O'Grady PM (2005) *Drosophila: A Guide to Species Identification and Use*. Academic Press.
18. Markow TA, Beall S, Matzkin LM (2009) Egg size, embryonic development time and ovoviviparity in *Drosophila* species. *Journal of Evolutionary Biology* 22: 430–434.
19. Campos-Ortega J, Hartenstein V (1985) *The embryonic development of Drosophila melanogaster*. Springer-Verlag:Berlin, New York.

20. Foe VE, Odell GM, Edgar BA (1993) *The Development of Drosophila melanogaster*, Cold Spring Harbor Press, chapter 3: Mitosis and Morphogenesis in the Drosophila Embryo. pp. 149-300.
21. Drosophila 12 Genomes Consortium, Clark A, Eisen M, Smith D, Bergman C, et al. (2007) Evolution of genes and genomes on the drosophila phylogeny. *Nature* 450: 203-218.
22. Foe VE, Alberts BM (1983) Studies of nuclear and cytoplasmic behaviour during the five mitotic cycles that precede gastrulation in Drosophila embryogenesis. *Journal of Cell Science* 61: 31-70.
23. Kam Z, Minden JS, Agard DA, Sedat JW, Leptin M (1991) Drosophila gastrulation: analysis of cell shape changes in living embryos by three-dimensional fluorescence microscopy. *Development (Cambridge, England)* 112: 365-370.
24. Arrhenius S (1915) *Quantitative laws in biological chemistry*. G. Bell and sons, ltd.
25. Kimmel CB, Ballard WW, Kimmel SR, Ullmann B, Schilling TF (1995) Stages of embryonic development of the zebrafish. *Developmental Dynamics* 203: 253-310.
26. Riddiford LM (1993) Hormones and drosophila development. In: Bate M, Martinez Arias A, editors, *The Development of Drosophila melanogaster*, Cold Spring Harbor Press, volume II. pp. 899-939.
27. Chávez VM, Marqués G, Delbecque JP, Kobayashi K, Hollingsworth M, et al. (2000) The drosophila disembodied gene controls late embryonic morphogenesis and codes for a cytochrome p450 enzyme that regulates embryonic ecdysone levels. *Development* 127: 4115-4126.
28. Lucchetta EM, Lee JH, Fu LA, Patel NH, Ismagilov RF (2005) Dynamics of Drosophila embryonic patterning network perturbed in space and time using microfluidics. *Nature* 434: 1134-1138.
29. Niemuth J, Wolf R (1995) Developmental asynchrony caused by steep temperature gradients does not impair pattern formation in the wasp, *pimpla turionellae* l. *Roux's Arch Dev Biol* 204: 444-452.
30. Girdler GC, Araya C, Ren X, Clarke JDW (2013) Developmental time rather than local environment regulates the schedule of epithelial polarization in the zebrafish neural rod. *Neural Development* 8: 5.
31. Davidson J (1944) On the relationship between temperature and rate of development of insects at constant temperatures. *Journal of Animal Ecology* 13: 26-38.
32. Gillooly JF, Brown JH, West GB, Savage VM, Charnov EL (2001) Effects of size and temperature on metabolic rate. *Science* 293: 2248-2251.
33. Gillooly JF, Charnov EL, West GB, Savage VM, H BJ (2002) Effects of size and temperature on developmental time. *Nature* 417: 70-73.
34. Clarke A (2004) Is there a universal temperature dependence of metabolism? *Functional Ecology* 18: 252-256.
35. Clarke A, Fraser KPP (2004) Why does metabolism scale with temperature? *Functional Ecology* 18: 243-251.
36. McNamara KJ (1982) Heterochrony and phylogenetic trends. *Paleobiology* 8: 130-142.
37. Jones DS, Gould SJ (1999) Direct measurement of age in fossil gryphaea: the solution to a classic problem in heterochrony. *Paleobiology* 25: 158-187.

38. Félix MA, Hill RJ, Schwarz H, Sternberg PW, Sudhaus W, et al. (1999) *Pristionchus pacificus*, a nematode with only three juvenile stages, displays major heterochronic changes relative to *Caenorhabditis elegans*. *Proceedings Biological sciences / The Royal Society* 266: 1617-1621.
39. Patel NH, Condrón BG, Zinn K (1994) Pair-rule expression patterns of even-skipped are found in both short- and long-germ beetles. *Nature* 367: 429-434.
40. Keller A (2007) *Drosophila melanogaster*'s history as a human commensal. *Current Biology* 17: R77-R81.
41. Technau GM (1986) Lineage analysis of transplanted individual cell in embryos of *Drosophila melanogaster*. i. the method. *Roux's Arch Dev Biol* 195: 389-398.
42. Santos A, Ortiz de Solórzano C, Vaquero JJ, Peña JM, Malpica N, et al. (1997) Evaluation of autofocus functions in molecular cytogenetic analysis. *Journal of microscopy* 188: 264-72.
43. Vollath D (1988) The influence of the scene parameters and of noise on the behaviour of automatic focusing algorithms. *Journal of microscopy* 151: 133-146.
44. Bownes M (1975) A photographic study of development in the living embryo. *J Embryol exp Morph* 33: 789-801.
45. Lachaise D, Silvain JF (2004) How two Afrotropical endemics made two cosmopolitan human commensals: the *Drosophila melanogaster*-*D. simulans* palaeogeographic riddle. *Genetica* 120: 17-39.
46. Patterson JT, Stone WS (1952) *Evolution in the genus Drosophila*. New York: Macmillan, 1 edition.
47. Granzotto A, Lopes F, Lerat E, Vieira C, Carareto C (2009) The evolutionary dynamics of *Helena* retrotransposon revealed by sequenced *Drosophila* genomes. *BMC Evolutionary Biology* 9: 174.

## Figures

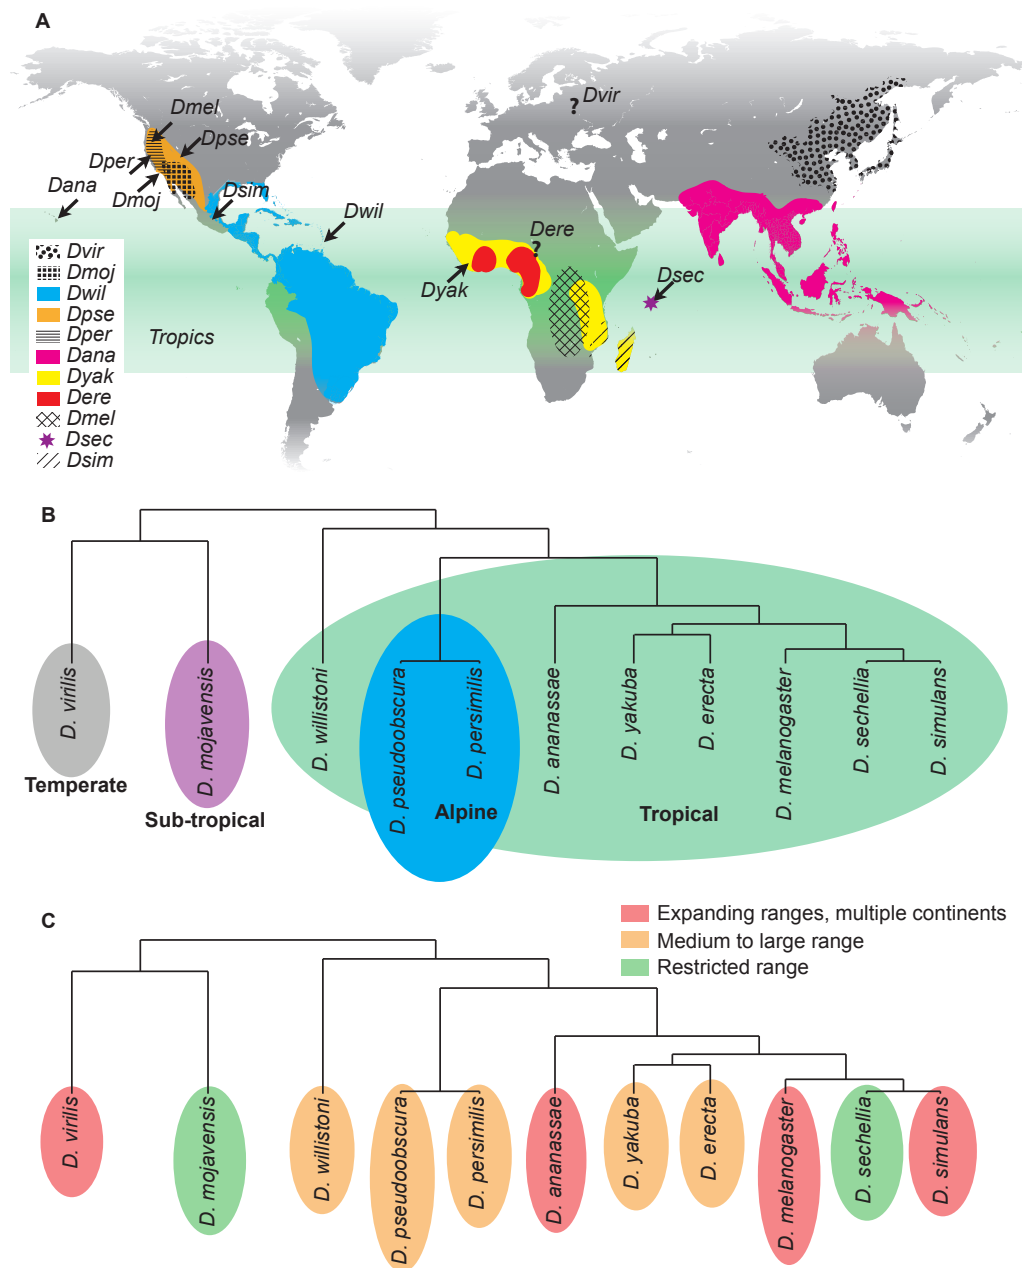

**Figure 1. Geographic and climatic origin and phylogeny of analyzed *Drosophila* species**  
 (A) Ancestral ranges are shown for each species [17, 45, 46]. While *D. melanogaster* and *D. simulans* are now cosmopolitan and *D. ananassae* is expanding in the tropics (green), their presumed ancestral ranges are shown. *D. virilis* is holarctic (gray) and restricted from the tropics, with a poor understanding of its ancestral range. Other species are more or less found in their native ranges, covering a variety of climates. Sites of collection are noted by arrows. (B) The phylogeny of the sequenced *Drosophila* species. Many of the tropical species are closely related, though *D. willistoni* serves as a tropical out-group compared to the melanogaster and obscura groups. Branch lengths are based on evolutionary divergence times [47]. (C) Range sizes vary considerably between the species.

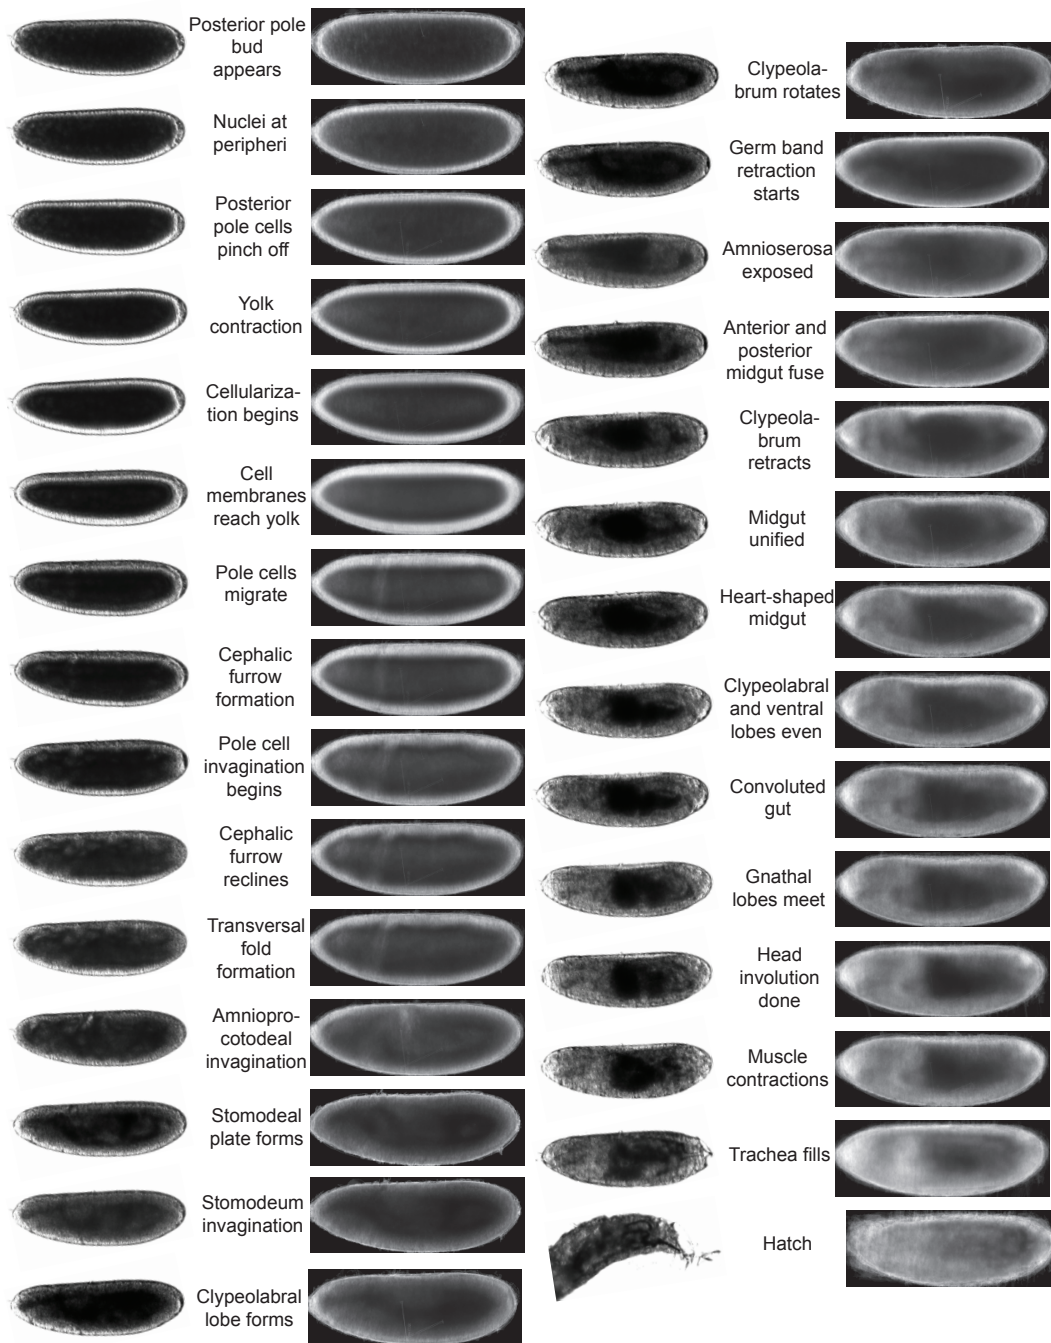

**Figure 2. Developmental landmarks used in study (A)** Many images of each stage (examples on the left) were averaged to generate composite images (lateral view on the right) for each of the developmental stages, of which 29 are shown.

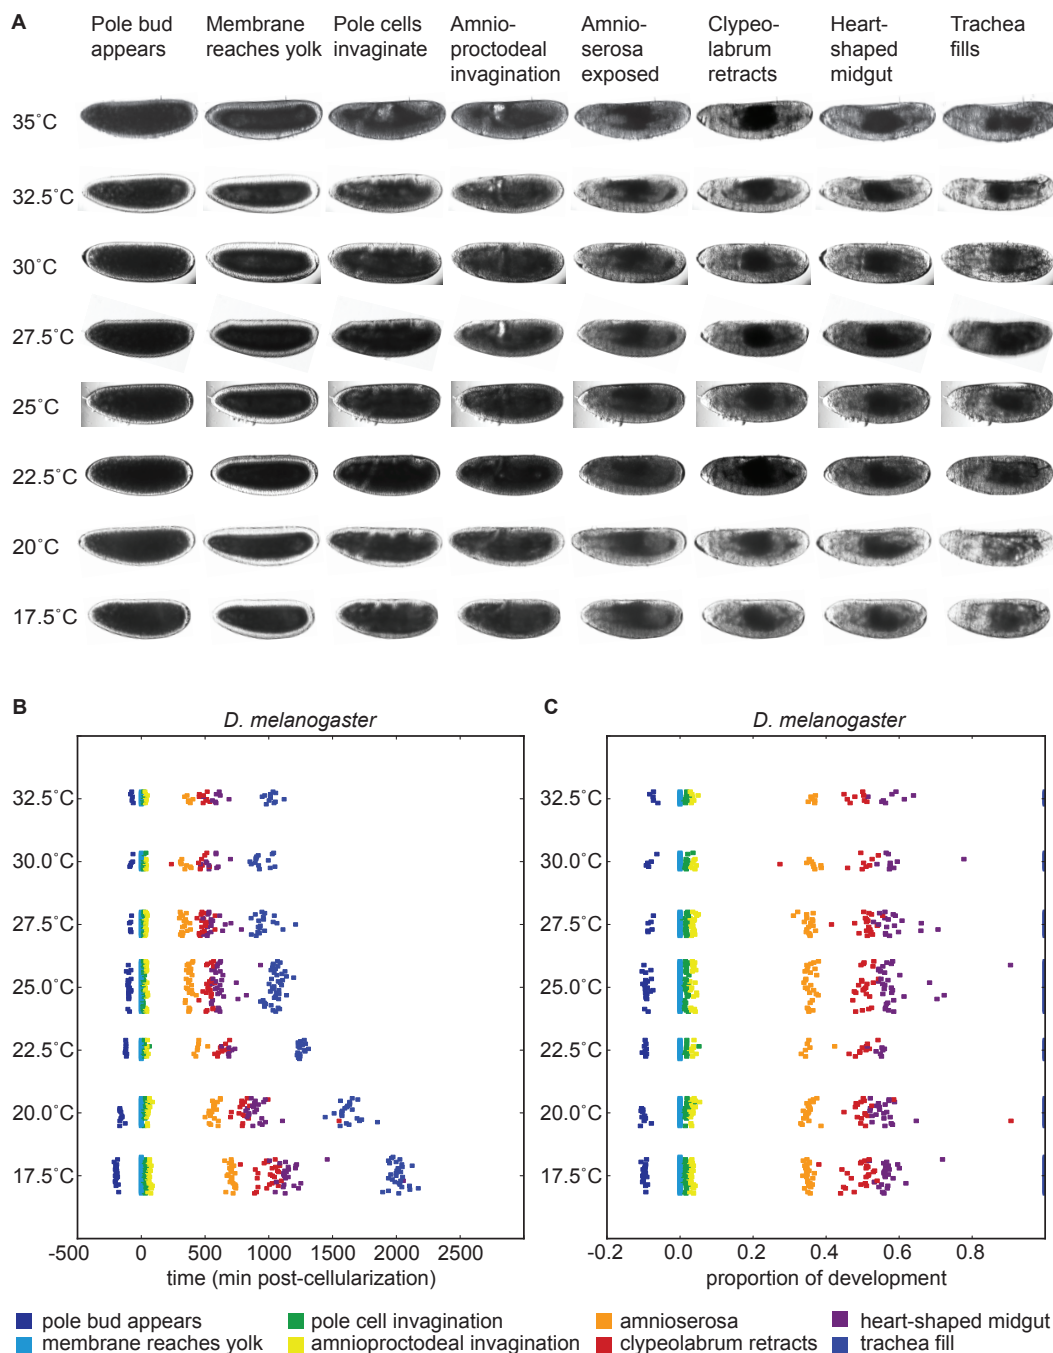

**Figure 3. Developmental time of *D. melanogaster* varies with temperature** (A) Images of developing *D. melanogaster* embryos at each temperature are shown for a selection of stages to highlight the overall similarity of development. (B) The time individual animals reached the various time-points are shown, with each event being a different color. Time 0 is defined as the end of cellularization, when the membrane invagination reaches the yolk. Between 17.5°C and 27.5°C the total time of embryogenesis,  $t_{dev}$  measured as the mean time between cellularization and trachea fill, has a logarithmic relationship to temperature described by  $t_{dev} = 4.02e^{37.31/T}$  where T is temperature in °C ( $R^2 = 0.963$ ). (C) The developmental rate in *D. melanogaster* changes uniformly with temperature, not preferentially affecting any stage. Timing here is normalized between the end of cellularization and the filling of the trachea.



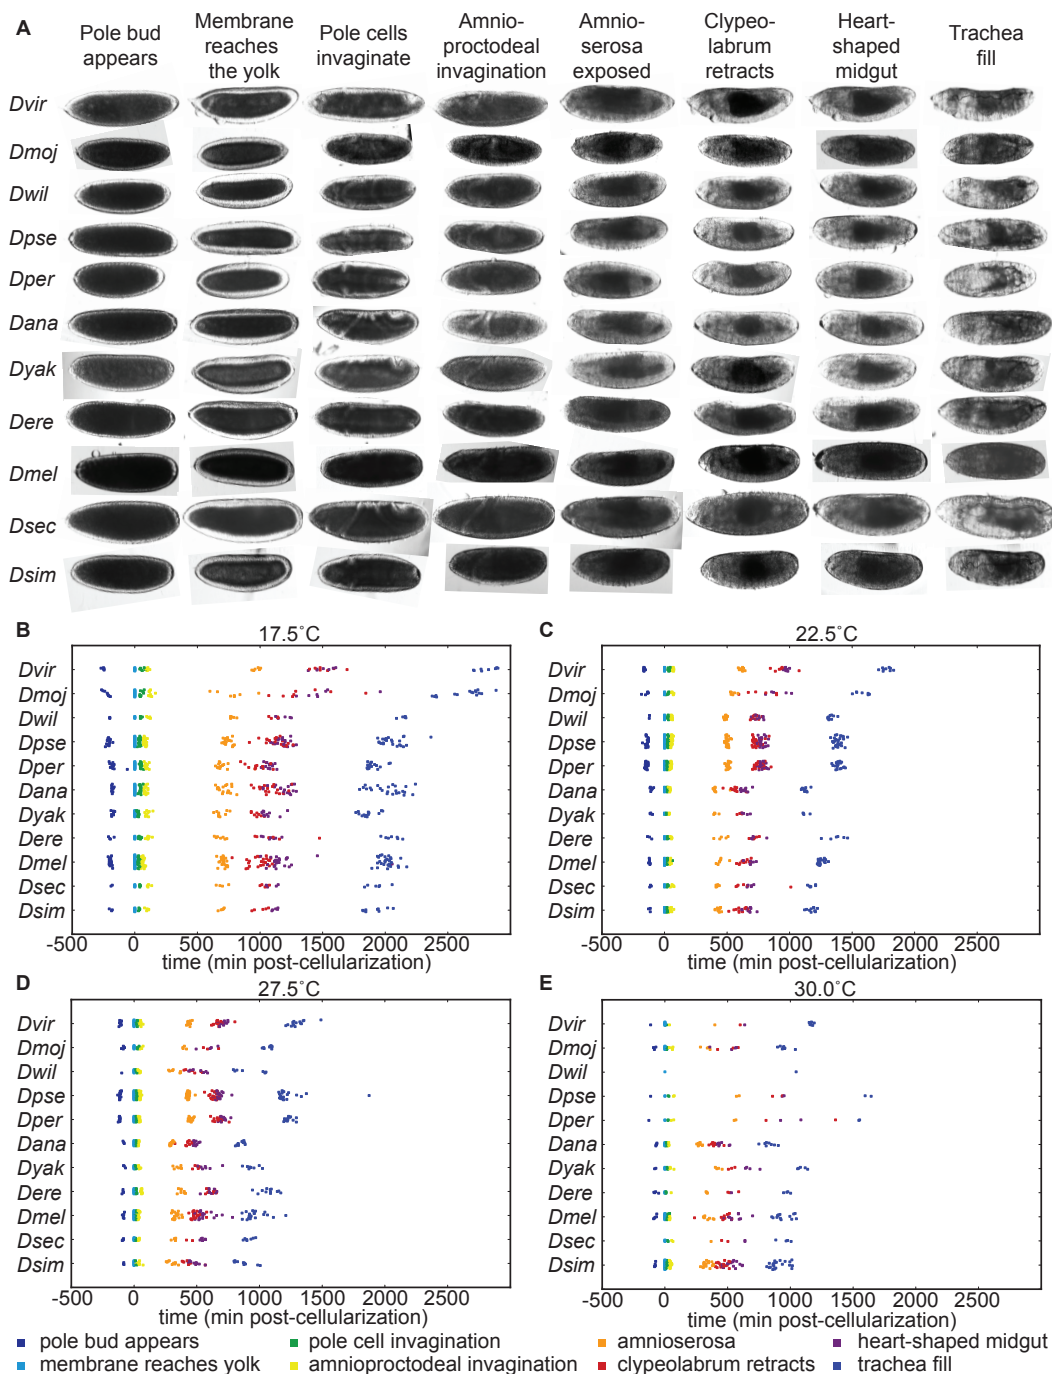

**Figure 4. *Drosophila* species develop at different rates and respond to temperature in distinct ways** (A) Images of developing embryos of each species are shown to scale. All species go through the same stages in the same order at all viable temperatures. (B) At 17.5°C all species show uniformly long developmental times, with *D. virilis* and *D. mojavensis* being significantly longer than other species. (C) At 22.5°C and (D) 27.5°C there is considerably more variation between species. While developmental times decrease with increasing temperature across all species, the effect is muted in the alpine species. (E) At 30°C, developmental rate has stopped accelerating and the alpine species are seeing considerable slow-down in development time.

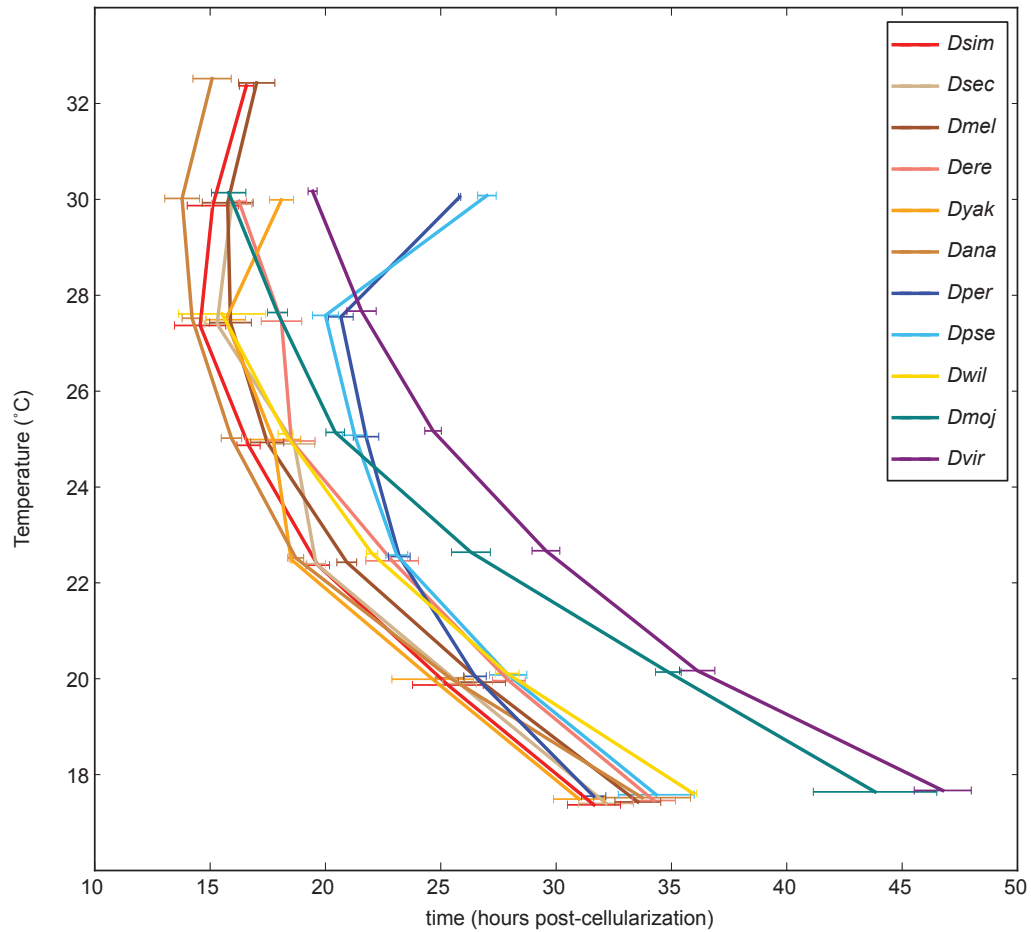

**Figure 5. Temperature dependent developmental rates are climate specific** The time between the end of cellularization and trachea fill are shown for all species at a range of temperatures. The climatic groups – tropical (warm colors), alpine (blues), temperate (purple), and sub-tropical (green) – clearly stand out from one another to form four general trends.

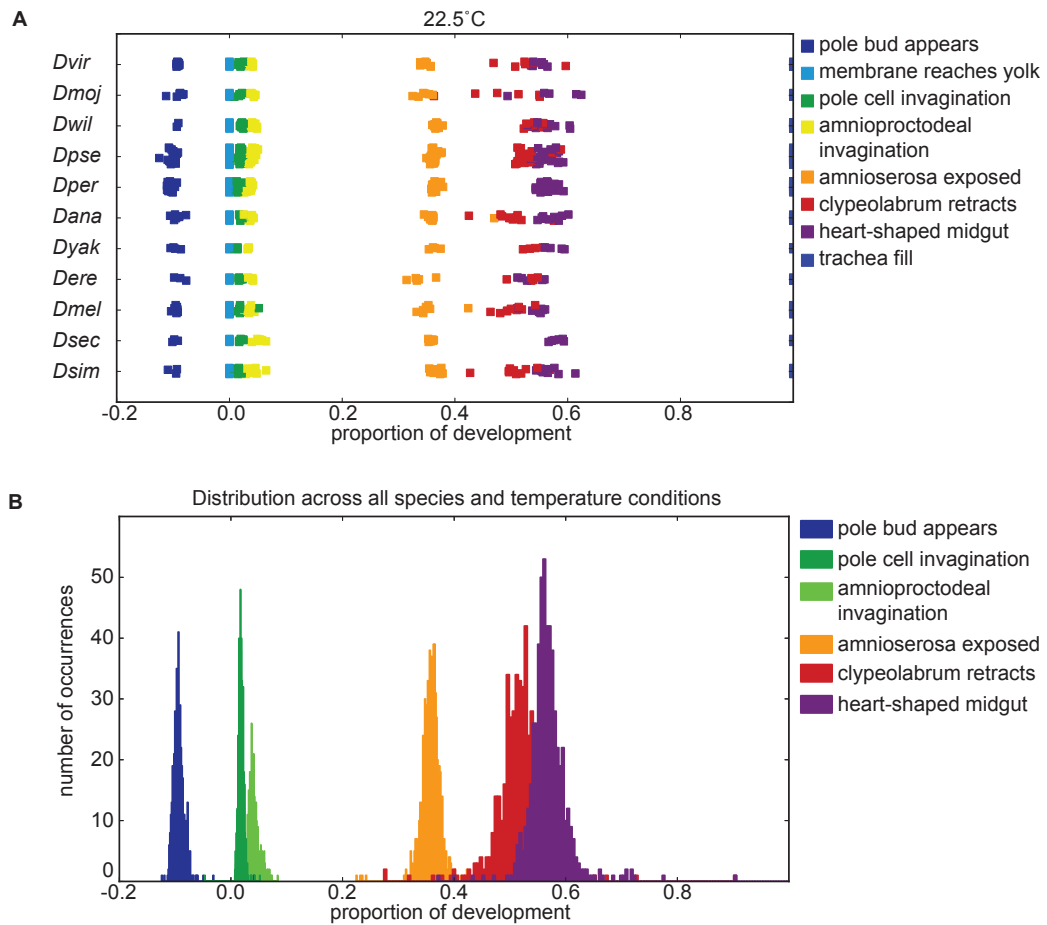

**Figure 6. Proportionality of developmental stages is not affected by non-heat-stress temperatures** (A) Across species, development maintains the same proportionality. *D. pseudoobscura* stands out as not being co-linear at higher temperatures. Instead, the later part of its development is slowed and takes up a disproportionately long time. (B) Plotting proportionality across all species and all temperatures reveals the approximately normally distributed proportionality of all morphological stages.

## Tables

**Table 1. *Drosophila* species and strains**

| Species                       | Stock number   | Strain               | Collection site                  |
|-------------------------------|----------------|----------------------|----------------------------------|
| <i>D. melanogaster</i>        |                | OreR                 | Oregon, USA                      |
| <i>D. pseudoobscura</i>       | 14011-0121.94  | MV2-25               | Mesa Verde, Colorado, USA        |
| <i>D. virilis</i>             | 15010-1051.87  | McAllister V46       | <i>unknown, possibly Asia</i>    |
| <i>D. yakuba</i>              | 14021-0261.01  | Begun Tai18E2        | Liberia                          |
| <i>D. persimilis</i>          | 14011-0111.49  | Machado MSH3         | Mt. St. Helena, California, USA  |
| <i>D. simulans</i>            | 14021-0251.195 | Begun simw501        | Mexico City, Mexico              |
| <i>D. erecta</i>              | 14021-0224.01  | (TSC)                | <i>unknown, probably Africa</i>  |
| <i>D. mojavensis wrigleyi</i> | 15081-1352.22  | Reed CI 12 IB-4 g8   | Catalina Island, California, USA |
| <i>D. sechellia</i>           | 14021-0248.25  | (Jones) Robertson 3C | Cousin Island, Seychelles        |
| <i>D. willistoni</i>          | 14030-0811.24  | Powell Gd-H4-1       | Guadeloupe Island, France        |
| <i>D. ananassae</i>           | 14024-0371.13  | Matsuda (AABBg1)     | Hawaii, USA                      |

**Table 2. Major morphological events in *Drosophila* development**

| Event                                | Stage [19, 44] | Notes                                                                       |
|--------------------------------------|----------------|-----------------------------------------------------------------------------|
| Posterior gap appears                | 2              | Gap between yolk and vitelline membrane                                     |
| <b>Pole bud appears</b>              | 3              | <b>Cells migrate into the posterior gap</b>                                 |
| Nuclei at periphery                  | 4              | Cells migrate to edges                                                      |
| Pole cells form                      | 4              | Replication of the pole cells                                               |
| Yolk contraction                     | 4              | Light edge of embryo expands                                                |
| Cellularization begins               | 5              | Cell cycle 14                                                               |
| <b>Membrane reaches the yolk</b>     | 5              | <b>This is regarded as the zero time-point</b>                              |
| Pole cells migrate                   | 6              | Pole cells begin anterior movement                                          |
| Cephalic furrow forms                | 6              | Dorsal and ventral furrows form                                             |
| <b>Pole cells invaginate</b>         | 7              | <b>Pole cells enter dorsal furrow</b>                                       |
| Transversal fold formation           | 7              | Dorsal furrows between amnioproctodeum and cephalic furrow                  |
| Cephalic furrow reclines             | 8              | Dorsal furrow moves posteriorly                                             |
| <b>Amnioproctodeal invagination</b>  | 8              | <b>Invagination approaches cephalic fold</b>                                |
| Anterior midgut primordial           | 8              | Tissue thickens at anterior ventral edge                                    |
| Stomodeal plate forms                | 9              | Ventral gap anterior to cephalic fold                                       |
| Stomodeum invagination               | 10             | Ventral furrow anterior to cephalic fold                                    |
| Clypeolabral lobe forms              | 10             | Dorsal, ventral furrows both present                                        |
| Germ band maxima                     | 11             | Maximum extension of germband                                               |
| Clypeolabrum rotates                 | 11             | Clypeolabrum shifts dorsally                                                |
| Posterior gap                        | 11             | Gap forms before germband shortening                                        |
| Gnathal bud appears                  | 12             | Ventral tissue between the clypeolabrum and cephalic folds moves anteriorly |
| Germband retraction begins           | 12             | Movement begins mid-germband                                                |
| <b>Amnioserosa exposed</b>           | 12             | <b>Germband retracted to the posterior 30% of the embryo</b>                |
| Germband retracted                   | 13             | Germband fully retracted                                                    |
| Dorsal divot                         | 14             | Dorsal gap between head and amnioserosa                                     |
| <b>Clypeolabrum retracts</b>         | 14             | <b>Clypeolabrum pulls away from anterior vitelline membrane</b>             |
| Anal plate forms                     | 14             | Posterior depression forms                                                  |
| Midgut unified                       | 14             | Dark circle forms at embryo's center                                        |
| <b>Heart-shaped midgut</b>           | 15             | <b>Triangular midgut</b>                                                    |
| Clypeolabrum even with ventral lobes | 16             | Ventral lobes move anteriorly to be even with clypeolabrum                  |
| Gnathal lobes pinch                  | 16             | Gnathal lobes meet                                                          |
| Convoluting gut                      | 16             | Separation between sections of the midgut                                   |
| Head involution done                 | 17             | Head lobes complete anterior migration                                      |
| Muscle contractions                  | 17             | Head begins twitching                                                       |
| <b>Trachea fills</b>                 | 17             | <b>Developmental end point</b>                                              |
| Hatch                                | 17             | Highly variable                                                             |

**Table 3. *Drosophila* development videos**

| Subject                                     | Link                                                                                                  |
|---------------------------------------------|-------------------------------------------------------------------------------------------------------|
| <i>D. melanogaster</i> with labelled stages | <a href="http://www.youtube.com/watch?v=dYSrXK3o86">http://www.youtube.com/watch?v=dYSrXK3o86</a>     |
| <i>D. melanogaster</i> at 7 temperatures    | <a href="http://www.youtube.com/watch?v=-yrs4DcFFF0">http://www.youtube.com/watch?v=-yrs4DcFFF0</a>   |
| 11 species at 17.5°C                        | <a href="http://www.youtube.com/watch?v=HIId_Idz-GhQ">http://www.youtube.com/watch?v=HIId_Idz-GhQ</a> |
| 11 species at 22.5°C                        | <a href="http://www.youtube.com/watch?v=j06JfgwMaH4">http://www.youtube.com/watch?v=j06JfgwMaH4</a>   |
| 11 species at 27.5°C                        | <a href="http://www.youtube.com/watch?v=v1YeuFqKQhI">http://www.youtube.com/watch?v=v1YeuFqKQhI</a>   |
| <i>D. ananassae</i> at 7 temperatures       | <a href="http://www.youtube.com/watch?v=vy6L4fmWkso">http://www.youtube.com/watch?v=vy6L4fmWkso</a>   |
| <i>D. mojavensis</i> at 6 temperatures      | <a href="http://www.youtube.com/watch?v=XWMs4oUx_mU">http://www.youtube.com/watch?v=XWMs4oUx_mU</a>   |
| <i>D. virilis</i> at 6 temperatures         | <a href="http://www.youtube.com/watch?v=eyr4ckDb0kM">http://www.youtube.com/watch?v=eyr4ckDb0kM</a>   |
| <i>D. pseudoobscura</i> at 6 temperatures   | <a href="http://www.youtube.com/watch?v=sYi-FUXpv4Q">http://www.youtube.com/watch?v=sYi-FUXpv4Q</a>   |

**Table 4. The timing of specific developmental events can be predicted as a function of total developmental time**

| Stage                        | Event Timing (hours post cellularization) | Percent Error |
|------------------------------|-------------------------------------------|---------------|
| Pole bud appears             | $t_{pba} \approx -0.093t_{dev}$           | 8%            |
| Pole cells invaginate        | $t_{pci} \approx 0.018t_{dev}$            | 40%           |
| Amnioproctodeal invagination | $t_{api} \approx 0.035t_{dev}$            | 18%           |
| Amnioserosa exposed          | $t_{ase} \approx 0.35t_{dev}$             | 6%            |
| Clypeolabrum retracts        | $t_{clr} \approx 0.49t_{dev}$             | 4%            |
| Heart-shaped midgut          | $t_{hsm} \approx 0.57t_{dev}$             | 12%           |



**Table 5. The developmental time of embryos between 17.5°C and 27.5°C is a species-specific function of temperature**

| Species                 | Developmental Time*          | $R^2$ | 95% Confidence Prediction Interval for Future Observations | $Q_{10}$<br>(27.5:17.5) |
|-------------------------|------------------------------|-------|------------------------------------------------------------|-------------------------|
| <i>D. virilis</i> **    | $t_{Dvir} = 5.64e^{37.08/T}$ | 0.989 | $t_{Dvir} \pm 31.937\sqrt{1.00 + (\frac{1}{T} - 0.04)^2}$  | 2.2                     |
| <i>D. mojavensis</i> ** | $t_{Dmoj} = 3.67e^{43.81/T}$ | 0.983 | $t_{Dmoj} \pm 54.263\sqrt{1.00 + (\frac{1}{T} - 0.05)^2}$  | 2.5                     |
| <i>D. willistoni</i>    | $t_{Dwil} = 3.63e^{40.50/T}$ | 0.944 | $t_{Dwil} \pm 3.122\sqrt{1.00 + (\frac{1}{T} - 0.04)^2}$   | 2.3                     |
| <i>D. pseudoobscura</i> | $t_{Dpse} = 7.61e^{25.95/T}$ | 0.903 | $t_{Dpse} \pm 39.257\sqrt{1.00 + (\frac{1}{T} - 0.05)^2}$  | 1.7                     |
| <i>D. persimilis</i>    | $t_{Dper} = 9.31e^{21.20/T}$ | 0.961 | $t_{Dper} \pm 22.598\sqrt{1.00 + (\frac{1}{T} - 0.05)^2}$  | 1.6                     |
| <i>D. ananassae</i>     | $t_{Dana} = 2.94e^{42.68/T}$ | 0.979 | $t_{Dana} \pm 1.440\sqrt{1.00 + (\frac{1}{T} - 0.05)^2}$   | 2.4                     |
| <i>D. yakuba</i>        | $t_{Dyak} = 4.67e^{33.08/T}$ | 0.943 | $t_{Dyak} \pm 2.203\sqrt{1.00 + (\frac{1}{T} - 0.05)^2}$   | 2.0                     |
| <i>D. erecta</i>        | $t_{Dere} = 5.21e^{32.97/T}$ | 0.937 | $t_{Dere} \pm 2.689\sqrt{1.00 + (\frac{1}{T} - 0.04)^2}$   | 2.0                     |
| <i>D. melanogaster</i>  | $t_{Dmel} = 4.02e^{37.31/T}$ | 0.963 | $t_{Dmel} \pm 1.281\sqrt{1.00 + (\frac{1}{T} - 0.05)^2}$   | 2.2                     |
| <i>D. sechellia</i>     | $t_{Dsec} = 4.47e^{34.67/T}$ | 0.957 | $t_{Dsec} \pm 2.386\sqrt{1.00 + (\frac{1}{T} - 0.04)^2}$   | 2.1                     |
| <i>D. simulans</i>      | $t_{Dsim} = 3.50e^{39.14/T}$ | 0.960 | $t_{Dsim} \pm 1.883\sqrt{1.00 + (\frac{1}{T} - 0.05)^2}$   | 2.3                     |

\* End of cellularization to trachea fill in hours, where T is in °C

\*\* Curve fit through 30°C
